# Supplementary material for: 3,3′-Selenobis(1-Benzyl-2-Oxo-1,2-Dihydropyridine-4-Carbaldehyde)
Source: Preprints.org preprint supplement (doi:10.20944/preprints202411.0412.v1), 2024-11-06

**SUPPORTING INFORMATION**

**3,3'-Selenobis(1-benzyl-2-oxo-1,2-dihydropyridine-4-carbaldehyde)**

Emeline Grosjean,1 Julien Rizet,1,2 Shekoufeh Arabi Aliabadi,1 Joelle Azéma-Despeyroux,1 Pascal Hoffmann,1 Christian Lherbet 1,*

1 LSPCMIB, Université Toulouse 3 Paul Sabatier, UMR CNRS UPS 5068, 118 Route de Narbonne, 31062 Toulouse, France.

2 Institut de Pharmacologie et de Biologie Structurale (IPBS), Université de Toulouse, CNRS, Université Toulouse III – Paul Sabatier (UPS), Toulouse, France.

|  | **Pages** |
| --- | --- |
| NMR spectra for compound **2** | 2 |
| NMR spectra for compound **3** | 3 |
| Mass data for compound **3** | 6 |

**Compound 2**

**Compound 3** :

**NOESY :**


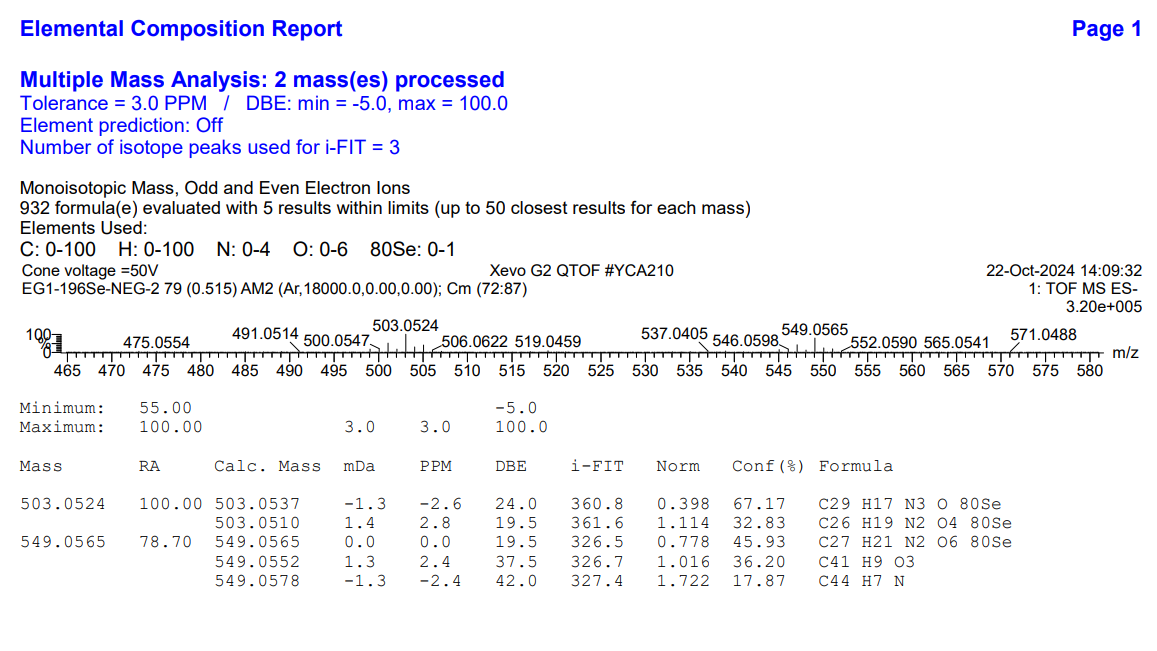


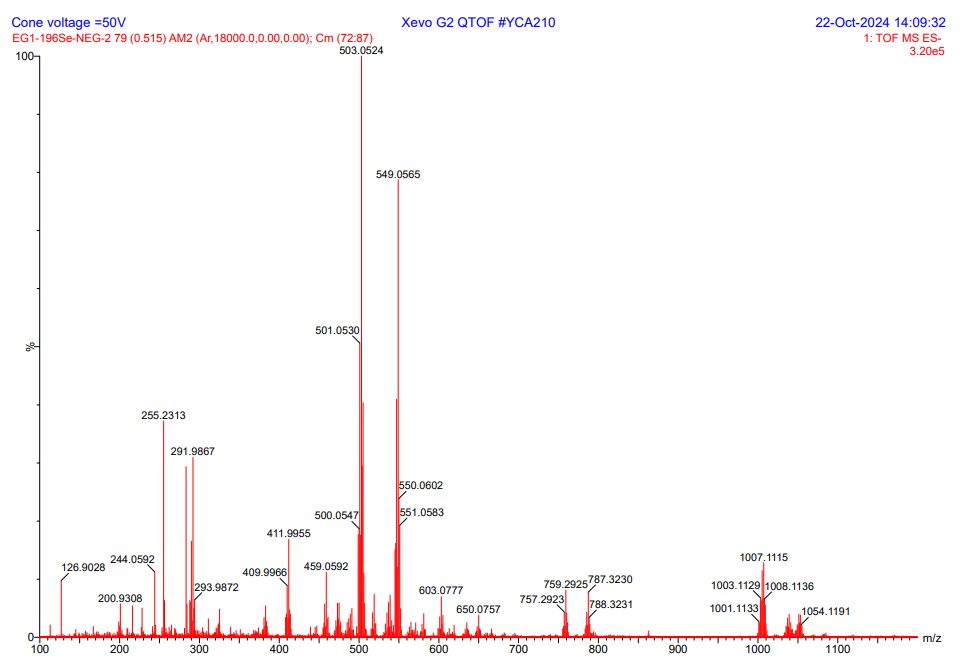

Supplement: Supplementary file 1 [file supplementary]
